# Supplementary material for: Robust phenotyping of highly multiplexed tissue imaging data using pixel-level clustering
Source: PubMed Central journal article supplement (PMC10393943; doi:10.1038/s41467-023-40068-5), 2023-08-01
Supplement: 41467_2023_40068_MOESM4_ESM.pdf [file 41467_2023_40068_MOESM4_ESM.pdf]

## **Description of Additional Supplementary Files**

### Supplementary Movie 1

Demonstration of the graphical user interface (GUI) for manual metacluster adjustment and annotation, publicly available on Github.
